# Supplementary material
Source: PubMed Central journal article supplement (PMC3798007)
Supplement: NIHMS512791-supplement-01.pdf [file NIHMS512791-supplement-01.pdf]

Type of file: figure

Label: Fig S1

Filename: sfig\_1.pdf

**A**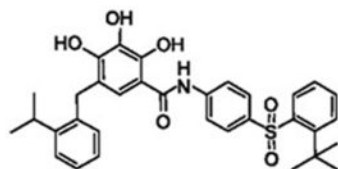

TW-37

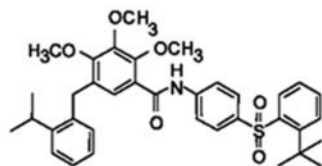

TW-37a

**B**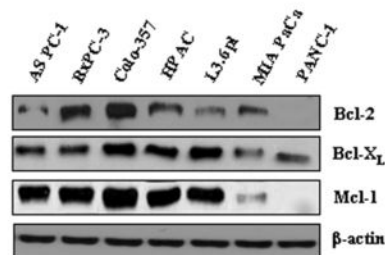**C**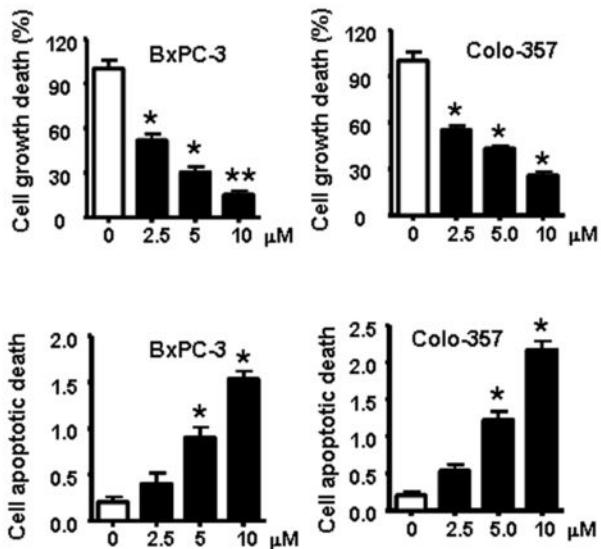**D**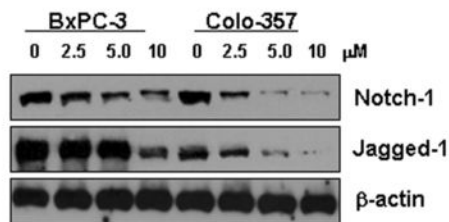

Supplementary figure 1

Type of file: figure

Label: Fig S2

Filename: sfig\_2.pdf

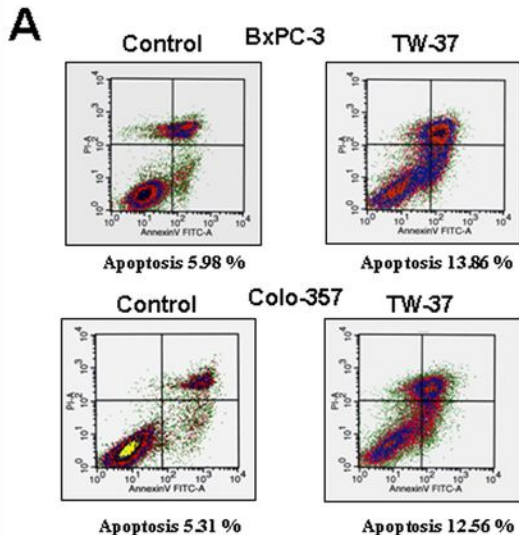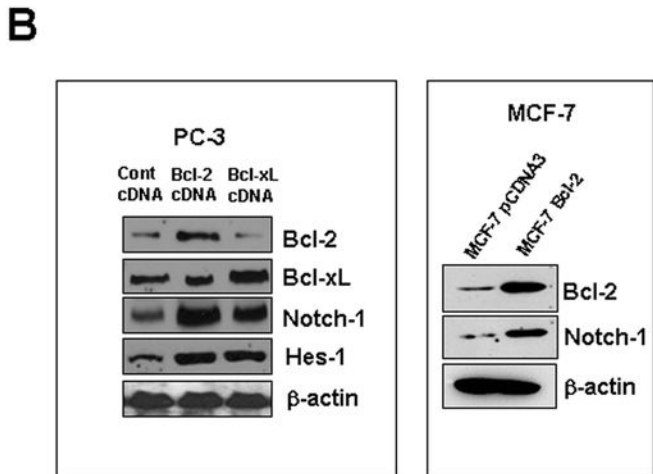

Supplementary figure 2

Type of file: figure

Label: Fig S3

Filename: sfig\_3.pdf

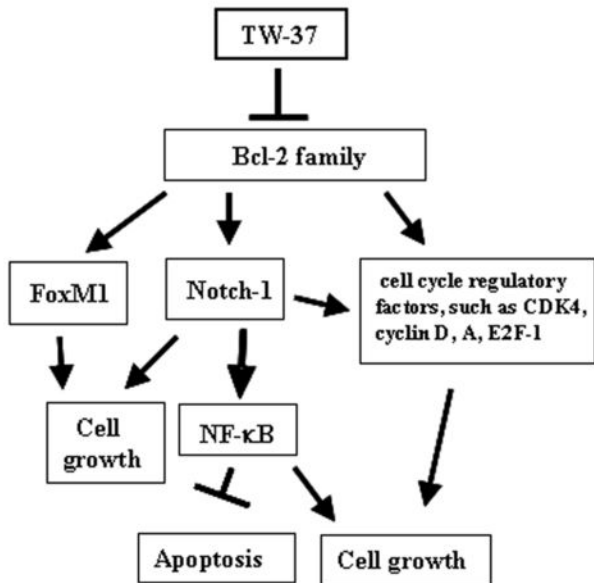

Supplementary figure 3
